# Genetic Distances and Reconstruction of Phylogenetic Trees From Microsatellite DNA

Naoko Takezaki and Masatoshi Nei

*Institute of Molecular Evolutionary Genetics and Department of Biology, The Pennsylvania State University, University Park, Pennsylvania 16802*

Manuscript received February 29, 1996

Accepted for publication June 6, 1996

## ABSTRACT

Recently many investigators have used microsatellite DNA loci for studying the evolutionary relationships of closely related populations or species, and some authors proposed new genetic distance measures for this purpose. However, the efficiencies of these distance measures in obtaining the correct tree topology remains unclear. We therefore investigated the probability of obtaining the correct topology ( $P_C$ ) for these new distances as well as traditional distance measures by using computer simulation. We used both the infinite-allele model (IAM) and the stepwise mutation model (SMM), which seem to be appropriate for classical markers and microsatellite loci, respectively. The results show that in both the IAM and SMM CAVALLI-SFORZA and EDWARDS' chord distance ( $D_C$ ) and NEI *et al.*'s  $D_A$  distance generally show higher  $P_C$  values than other distance measures, whether the bottleneck effect exists or not. For estimating evolutionary times, however, NEI's standard distance and GOLDSTEIN *et al.*'s  $(\delta\mu)^2$  are more appropriate than other distances. Microsatellite DNA seems to be very useful for clarifying the evolutionary relationships of closely related populations.

ALLELE frequency data are useful for studying evolutionary relationships of closely related species or populations. In this case it is customary to use some genetic distance measures for constructing trees. Using computer simulation, NEI *et al.* (1983) examined the relative efficiencies of different distance measures for obtaining the correct tree topology with the assumption that new mutant alleles are always different from the existing ones in the population [infinite-allele model (IAM); KIMURA and CROW 1964]. This model seems to apply approximately to classical genetic markers such as protein and blood group polymorphisms (NEI 1987). In recent years, however, microsatellite DNA loci are often used for phylogenetic analysis (*e.g.*, BOWCOCK *et al.* 1994; ROY *et al.* 1994; DEKA *et al.* 1995), and these loci seem to be subject to a mutational pattern that roughly follows OHTA and KIMURA's (1973) stepwise mutation model (SMM). For this reason, GOLDSTEIN *et al.* (1995a) and SHRIVER *et al.* (1995) developed new genetic distance measures.

However, the efficiencies of these distance measures in phylogenetic reconstruction compared with those of traditional distance measures are unclear when they are applied to microsatellite DNA loci. Furthermore, NEI *et al.*'s (1983) study is based on a small number of replications, so that a more careful study is necessary even for the IAM. The purpose of this paper is to study the efficiencies of genetic distance measures in phyloge-

netic reconstruction by using computer simulation. In this paper we will consider only two methods of phylogenetic reconstruction: the neighbor-joining (NJ) method (SAITOU and NEI 1987) and the unweighted pair group method with arithmetic mean (UPGMA; SNEATH and SOKAL 1973). UPGMA seems to be useful for allele frequency data when the evolutionary rate is nearly the same for all populations (NEI 1987), whereas the NJ method is known to be applicable for a variety of situations (NEI 1991). UPGMA usually produces a rooted tree, but in this paper we removed the root to make a fair comparison with the NJ method that produces only unrooted trees. In this paper we are primarily interested in the accuracy of the phylogenetic tree topology obtained, but the time dependency and sampling error of each distance measure will also be considered. Preliminary results of some parts of this study have been published by NEI and TAKEZAKI (1994).

## METHODS OF COMPUTER SIMULATION

**Genetic distance measures:** Various genetic distance measures used for gene frequency data have been described by NEI (1987). Here, we present only the definitions and brief explanations of the distance measures examined in this study.

NEI's (1972) standard genetic distance ( $D_S$ ):

$$D_S = -\ln [J_{XY}/\sqrt{J_X J_Y}], \quad (1)$$

where  $J_X = \sum_j \sum_i^m x_{ij}^2/r$  and  $J_Y = \sum_j \sum_i^m y_{ij}^2/r$  are the average homozygosities over loci in populations X and Y, respectively, and  $J_{XY} = \sum_j \sum_i^m x_{ij}y_{ij}/r$ . Here,  $x_{ij}$  and  $y_{ij}$

Corresponding author: Masatoshi Nei, Institute of Molecular Evolutionary Genetics, The Pennsylvania State University, 328 Mueller Laboratory, University Park, PA 16802.  
E-mail: nxm2@psu.edu

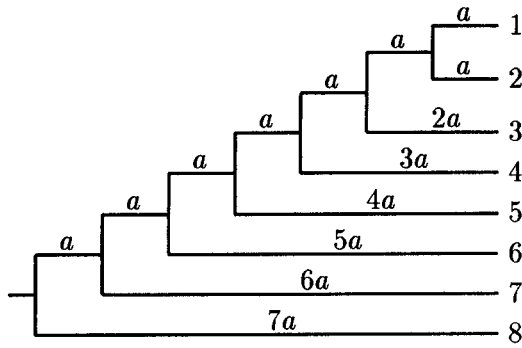

FIGURE 1.—Model tree used for computer simulation.  $a$  is a branch length in unit of expected number of mutations accumulated per locus ( $vt$ ).  $a$  was 0.1 and 0.04 for the IAM, and 0.4 and 0.04 for the SMM.

are the frequencies of the  $i$ th allele at the  $j$ th locus in populations  $X$  and  $Y$ , respectively,  $m_j$  is the number of alleles at the  $j$ th locus, and  $r$  is the number of loci examined. Under the IAM,  $D_S$  is expected to increase linearly with time, if the mutation-drift balance is maintained throughout the evolutionary process. That is,  $E(D_S) = 2vt$  where  $v$  is a mutation rate per locus per generation and  $t$  is the time measured in generations after divergence of the two populations.

NEI's (1973) minimum genetic distance ( $D_m$ ):

$$D_m = (J_X + J_Y)/2 - J_{XY}. \tag{2}$$

The expectation of  $D_m$  is known to be  $E(D_m) = J(1 - e^{-2vt})$ , where  $J$  is the expected homozygosity of the two populations.

LATTER's (1972)  $F_{ST}$  ( $=\phi^*$ ) distance:

$$F_{ST} = \frac{(J_X + J_Y)/2 - J_{XY}}{1 - J_{XY}}. \tag{3}$$

REYNOLDS *et al.*'s (1983)  $\theta_w$  becomes essentially the same as this  $F_{ST}$  when sample size is large. The measure  $D_L = -\ln(1 - F_{ST})$  has also been proposed (LATTER 1972; REYNOLDS *et al.* 1983), but our study has shown that the efficiency of  $D_L$  in obtaining the correct tree topology is almost the same as or slightly lower than that of  $F_{ST}$  (NEI and TAKEZAKI 1994; unpublished results). Therefore, the results for  $D_L$  will not be considered in this paper.

ROGERS' (1972) distance:

$$D_R = \frac{1}{r} \sum_j \sqrt{\frac{\sum_i m_j (x_{ij} - y_{ij})^2}{2}}. \tag{4}$$

PREVOSTI *et al.*'s (1975) distance has a statistical property similar to that of  $D_R$  and is defined as

$$C_p = \sum_j \sum_i |x_{ij} - y_{ij}| / (2r). \tag{5}$$

CAVALLI-SFORZA and EDWARDS' (1967) chord distance:

$$D_C = (2/\pi r) \sum_j \sqrt{2 \left( 1 - \sum_i \sqrt{x_{ij} y_{ij}} \right)}. \tag{6}$$

If we represent two populations on the surface of a multidimensional hypersphere using allele frequencies at the  $j$ th locus,  $D_C$  for the locus gives the chord distance between the two populations, where the angle ( $\theta_j$ ) for the two populations is given by  $\cos \theta_j = \sum_i \sqrt{x_{ij} y_{ij}}$ . By contrast, BHATTACHARYYA (1946) and NEI (1987) suggested that the distance between the two populations be measured by  $\theta^2 = \sum_j (\arccos \theta_j)^2 / r$ . However, the performance of this distance measure in obtaining the correct topology is essentially the same as that of  $D_A$  given below, so that we shall not consider this measure in this paper (see NEI and TAKEZAKI 1994 for the results for the IAM).

NEI *et al.*'s (1983)  $D_A$  distance:

$$D_A = 1 - \frac{1}{r} \sum_j \sum_i \sqrt{x_{ij} y_{ij}}. \tag{7}$$

NEI *et al.*'s (1983) computer simulation with the IAM has shown that this distance is more efficient than  $D_S$ ,  $D_m$ ,  $D_R$ , and CAVALLI-SFORZA's (1969)  $f_\theta$  in obtaining the correct topology. SANGHVI's (1953)  $X^2$  distance is closely related to  $\theta^2$  and is given by

$$X^2 = \sum_j \sum_i 2 \frac{(x_{ij} - y_{ij})^2}{(x_{ij} + y_{ij})} / r. \tag{8}$$

This is approximately given by  $4\theta^2$  when  $\theta_j$ 's are small (NEI 1987).

In recent years many authors have started to use microsatellite DNAs that are repeats of generally two to five nucleotides. There is a high degree of polymorphism with respect to the number of repeats at a microsatellite locus. An allele at this locus is usually represented by the number of tandem repeats, and this number may increase or decrease by mutation roughly following the SMM, as mentioned earlier. In the SMM an allele in state  $i$  (an allele with  $i$  repeats) is assumed to mutate to an allele either in state  $i + 1$  or  $i - 1$  with an equal probability. With this assumption, GOLDSTEIN *et al.* (1995a) proposed that the following distance measure be used for microsatellite loci.

$$(\delta\mu)^2 = \sum_j (\mu_{X_j} - \mu_{Y_j})^2 / r, \tag{9}$$

where  $\mu_{X_j} (= \sum_i i x_{ij})$  and  $\mu_{Y_j} (= \sum_i i y_{ij})$  are average allelic states at the  $j$ th locus, and  $x_{ij}$  and  $y_{ij}$  are the frequencies of the allele in state  $i$  at the  $j$ th locus in populations  $X$  and  $Y$ , respectively.

A distance measure closely related to  $(\delta\mu)^2$  is the average square distance (ASD) (GOLDSTEIN *et al.* 1995b; SLATKIN 1995), defined as  $ASD = \sum_k \sum_{i,j} (i - j)^2 x_{ik} y_{jk} / r$ . Under the assumption of mutation-drift balance, the expected values of  $(\delta\mu)^2$  and ASD are given by  $E[(\delta\mu)^2] = 2vt$  and  $E(ASD) = 2vt + 2(2N - 1)v$ , respectively,

TABLE 1  
Percentage of replications in which the correct topology was obtained for the infinite-allele model

| No. loci              | NJ    |       |       |          |       |       | Unrooted UPGMA |       |       |       |          |       |       |       |
|-----------------------|-------|-------|-------|----------|-------|-------|----------------|-------|-------|-------|----------|-------|-------|-------|
|                       | $D_R$ | $D_m$ | $D_S$ | $F_{ST}$ | $X^2$ | $D_C$ | $D_A$          | $D_R$ | $D_m$ | $D_S$ | $F_{ST}$ | $X^2$ | $D_C$ | $D_A$ |
| $a = 0.1; H = 0.5$    |       |       |       |          |       |       |                |       |       |       |          |       |       |       |
| 10                    | 8     | 7     | 4     | 6        | 13    | 17    | 17             | 10    | 7     | 9     | 6        | 14    | 17    | 19    |
| 30                    | 33    | 36    | 25    | 38       | 57    | 58    | 62             | 42    | 42    | 43    | 27       | 57    | 59    | 63    |
| 50                    | 55    | 60    | 44    | 65       | 73    | 77    | 80             | 58    | 61    | 62    | 56       | 81    | 80    | 83    |
| 100                   | 82    | 85    | 73    | 87       | 92    | 94    | 94             | 88    | 88    | 87    | 80       | 96    | 95    | 98    |
| $a = 0.1; H = 0.16$   |       |       |       |          |       |       |                |       |       |       |          |       |       |       |
| 10                    | 5     | 5     | 3     | 7        | 7     | 6     | 7              | 2     | 4     | 3     | 3        | 4     | 3     | 4     |
| 30                    | 24    | 29    | 17    | 32       | 32    | 31    | 36             | 21    | 24    | 24    | 15       | 27    | 24    | 30    |
| 50                    | 45    | 48    | 34    | 51       | 56    | 50    | 59             | 39    | 42    | 42    | 21       | 43    | 41    | 45    |
| 100                   | 71    | 74    | 60    | 78       | 77    | 74    | 80             | 67    | 68    | 68    | 46       | 70    | 69    | 73    |
| $a = 0.004; H = 0.5$  |       |       |       |          |       |       |                |       |       |       |          |       |       |       |
| 10                    | 10    | 5     | 5     | 6        | 22    | 31    | 25             | 9     | 8     | 7     | 7        | 33    | 33    | 31    |
| 30                    | 35    | 24    | 22    | 24       | 63    | 71    | 69             | 46    | 40    | 40    | 39       | 74    | 80    | 80    |
| 50                    | 49    | 39    | 39    | 41       | 84    | 89    | 88             | 65    | 63    | 60    | 64       | 93    | 95    | 95    |
| 100                   | 81    | 72    | 72    | 72       | 98    | 100   | 98             | 90    | 87    | 87    | 86       | 99    | 100   | 100   |
| $a = 0.004; H = 0.16$ |       |       |       |          |       |       |                |       |       |       |          |       |       |       |
| 10                    | 1     | 2     | 2     | 2        | 2     | 3     | 3              | 2     | 1     | 1     | 2        | 1     | 3     | 2     |
| 30                    | 5     | 4     | 4     | 5        | 10    | 18    | 15             | 5     | 6     | 5     | 4        | 14    | 13    | 13    |
| 50                    | 11    | 7     | 7     | 8        | 22    | 31    | 28             | 14    | 11    | 11    | 11       | 26    | 26    | 31    |
| 100                   | 32    | 22    | 21    | 27       | 44    | 58    | 54             | 41    | 33    | 32    | 28       | 53    | 57    | 62    |

$a = 0.1$ .  $N = 100$  and  $v = 0.0025$  for  $H = 0.5$ .  $N = 100$  and  $v = 0.0005$  for  $H = 0.16$ .  $a = 0.004$ .  $N = 250$  and  $v = 0.001$  for  $H = 0.5$ .  $N = 100$  and  $v = 0.0005$  for  $H = 0.16$ .

where  $v$  is the mutation rate per locus per generation and  $N$  is the effective population size. Therefore, both measures are linearly related to evolutionary time  $t$ . However,  $ASD$  has a larger variance than  $(\delta\mu)^2$ , so that we consider only  $(\delta\mu)^2$  in this paper. Another related distance measure is SHRIVER *et al.*'s (1995), which is given by

$$D_{SW} = W_{XY} - (W_X + W_Y)/2, \quad (10)$$

where  $W_X = \sum_k \sum_{i \neq j} |i - j| x_{ik} x_{jk} / r$ ,  $W_Y = \sum_k \sum_{i \neq j} |i - j| y_{ik} y_{jk} / r$ ,  $W_{XY} = \sum_k \sum_{i \neq j} |i - j| x_{ik} y_{jk} / r$ .

**Simulation procedures:** The method of computer simulation was essentially the same as that of NEI *et al.* (1983). Figure 1 shows the model tree used in the simulation. The allele frequency data for monoecious diploid populations were generated by introducing mutations and sampling alleles at random in each generation. In the case of the IAM, it was assumed that whenever a mutation occurs, it creates a new allele. In the SMM, a mutation was assumed to create a new allele as described earlier. When a population was split into two descendant populations, the initial allele frequencies of the two populations were assumed to be identical with those of the ancestral one, and the reproductive isolation occurred immediately. In the study of the ef-

fects of population bottlenecks (population size change), we assumed that the size of populations 2, 5, and 8 in Figure 1 was reduced to half the original size as soon as population splitting occurred. This scheme of simulation is certainly artificial. But it will give some idea about the bottleneck effect on reconstruction of phylogenetic trees. Allele frequency data were generated for 10, 30, 50, . . . , independent loci, and NJ and UPGMA trees were constructed by using various genetic distance measures. After 200 replications, the percentage ( $P_C$ ) of replications in which the correct topology was obtained was calculated.

The expected number of gene substitutions per locus along the shortest branch ( $a = vt$ ) of the model tree was 0.1 or 0.004 for the IAM, as was in the case of NEI *et al.*'s (1983) simulation. The value of  $a = 0.1$  is intended to represent trees for different species, whereas  $a = 0.004$  is appropriate for trees constructed for populations within species (see NEI 1987, p. 242). In the case of the SMM,  $a$  was set to 0.4 and 0.04. When  $a = 0.4$ , the largest expected distance (5.6) between populations is similar to the observed distance between African and non-African human populations for 30 microsatellite loci (GOLDSTEIN *et al.* 1995a). The value of  $a = 0.04$  is intended to represent the divergence level of very

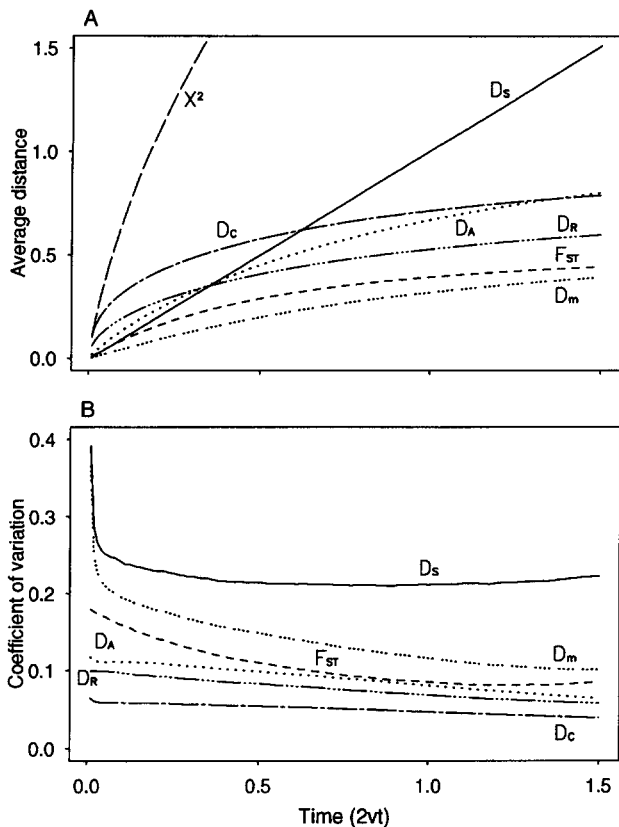

FIGURE 2.—Relationships of the mean distance and coefficient of variation with evolutionary time ( $2vt$ ) for the case of the IAM with  $H = 0.5$ . (A) Mean distance. (B) Coefficient of variation (CV). The means and CV's for each distance measure were computed for 100 loci and 30 loci, respectively, with 1000 replications.

closely related populations. The divergence level between species can be much greater than that expected for the case of  $a = 0.4$ . However, the conclusion from the case of  $a = 0.4$  essentially holds for trees of such highly divergent populations, as will be shown later.

The expected heterozygosity ( $H$ ) was assumed to be 0.5 or 0.16 for the IAM and 0.8 or 0.5 for the SMM. For the IAM,  $H = 0.5$  represents a high level of heterozygosity and  $H = 0.16$  a low level of heterozygosity for classical genetic markers (NEI 1987, p. 197). In the case of microsatellite loci, the average heterozygosity seems to be generally between 0.5 and 0.8 (BOWCOCK *et al.* 1994; GOTTELLI *et al.* 1994; ROY *et al.* 1994; DEKA *et al.* 1995; FORBES *et al.* 1995; JORDE *et al.* 1995; PAETKAU *et al.* 1995). Theoretically,  $H$  is a function of an effective population size ( $N$ ) and a mutation rate ( $v$ ) per generation. That is,  $H = 4Nv/(1 + 4Nv)$  for the IAM and  $H = 1 - 1/\sqrt{1 + 8Nv}$  for the SMM. Various values of  $N$  and  $v$  were used to generate the  $H$  values mentioned above, but to save computer time we used  $N$ , which was  $\leq 300$ . NEI *et al.*'s (1983) results and our preliminary study have shown that the  $P_C$  value primarily depends on  $vt$  and  $Nv$  rather than on  $v$ ,  $t$ , and  $N$ , separately, as expected from LI and NEI's (1975) theoretical study of

the means and variances of  $D_m$  and  $D_S$ . This was the case even in the presence of bottleneck effects.

## RESULTS

**Infinite-allele model: Constant population size:** Table 1 shows the  $P_C$  values for the case of constant population size for the IAM. The  $P_C$  values for distance measure  $C_p$  are not shown here because they are similar to those for  $D_R$  (see NEI and TAKEZAKI 1994). This table also does not include  $P_C$ 's for  $(\delta\mu)^2$  and  $D_{SW}$ , because these distances are not computable in this case.

The  $P_C$  values for all the traditional distance measures for 10 loci are quite low whether the levels of divergence and heterozygosity are high or low. In many cases,  $P_C$  values are  $< 10\%$ . This indicates that phylogenetic trees constructed with a small number of loci are not reliable. As the number of loci increases, however,  $P_C$  gradually increases. Therefore, it is important to use a large number of loci for constructing a population tree (NEI *et al.* 1983). Irrespective of the divergence level ( $a = 0.1$  or  $0.004$ ),  $P_C$  is higher for a high heterozygosity level ( $H = 0.5$ ) than for a low heterozygosity level ( $H = 0.16$ ). When  $H$  is high,  $P_C$  is higher for a low divergence level ( $a = 0.004$ ) than for a high divergence level ( $a = 0.1$ ). When  $H$  is low, however,  $P_C$  is higher for a high divergence level than for a low divergence level.

Since the population size remained the same throughout the evolutionary process in this case, the expected evolutionary rate was constant for all different lineages. In such a case UPGMA is known to be efficient for obtaining a correct tree (NEI 1987, 1991). Table 1 shows that  $P_C$ 's for UPGMA are slightly higher than those for NJ except for the case of  $a = 0.1$ ;  $H = 0.16$  and for  $F_{ST}$  for the case of  $a = 0.1$ ;  $H = 0.5$ . UPGMA is based on the assumption of the molecular clock (NEI 1975, p. 200). Therefore, a distance measure that is linearly related to evolutionary time is expected to perform well in UPGMA. Indeed, the linear distance  $D_S$  shows a slightly higher  $P_C$  value in UPGMA than in NJ for all cases, but there are other distance measures that give a higher  $P_C$  than  $D_S$  when UPGMA is used. This has occurred because  $D_S$  has a larger variance than some other distance measures.

There are considerable differences in  $P_C$  among different distance measures. The  $P_C$  values for  $D_A$ ,  $D_C$ , and  $X^2$  are generally higher than those for the others. Among these three distance measures, the  $P_C$  values for  $X^2$  are slightly lower than those for the first two. Although  $D_A$  and  $D_C$  show similar  $P_C$  values,  $D_A$  performs slightly better than  $D_C$  for the case of NJ with  $a = 0.1$ , whereas  $D_C$ 's performance is slightly better than  $D_A$  when  $a = 0.004$ . Among the remaining distance measures,  $F_{ST}$  tends to show the highest  $P_C$  when NJ is used but not when UPGMA is used. Previously, we mentioned that the expected value of  $D_S$  increases linearly with time, but when NJ is used, it has a low  $P_C$  value.

**TABLE 2**  
**Percentage of replications in which the correct topology was obtained**  
**for the infinite-allele model in the case of the bottleneck**

| No. loci              | NJ    |       |       |          |       |       |       | Unrooted UPGMA |       |       |          |       |       |       |
|-----------------------|-------|-------|-------|----------|-------|-------|-------|----------------|-------|-------|----------|-------|-------|-------|
|                       | $D_R$ | $D_m$ | $D_S$ | $F_{ST}$ | $X^2$ | $D_C$ | $D_A$ | $D_R$          | $D_m$ | $D_S$ | $F_{ST}$ | $X^2$ | $D_C$ | $D_A$ |
| $a = 0.1; H = 0.5$    |       |       |       |          |       |       |       |                |       |       |          |       |       |       |
| 10                    | 5     | 5     | 3     | 6        | 14    | 15    | 15    | 4              | 4     | 6     | 1        | 15    | 15    | 13    |
| 30                    | 25    | 25    | 16    | 32       | 48    | 46    | 50    | 11             | 6     | 27    | 0        | 42    | 46    | 42    |
| 50                    | 39    | 44    | 31    | 52       | 65    | 66    | 69    | 13             | 6     | 39    | 0        | 57    | 67    | 61    |
| 100                   | 68    | 75    | 57    | 76       | 87    | 87    | 91    | 11             | 3     | 63    | 0        | 78    | 84    | 78    |
| $a = 0.1; H = 0.16$   |       |       |       |          |       |       |       |                |       |       |          |       |       |       |
| 10                    | 5     | 6     | 3     | 5        | 6     | 6     | 8     | 3              | 3     | 3     | 1        | 4     | 4     | 5     |
| 30                    | 24    | 26    | 17    | 25       | 31    | 28    | 33    | 20             | 19    | 22    | 2        | 26    | 23    | 28    |
| 50                    | 45    | 50    | 36    | 40       | 53    | 49    | 56    | 35             | 34    | 40    | 2        | 44    | 40    | 45    |
| 100                   | 71    | 77    | 63    | 72       | 80    | 75    | 81    | 64             | 58    | 67    | 0        | 73    | 69    | 77    |
| $a = 0.004; H = 0.5$  |       |       |       |          |       |       |       |                |       |       |          |       |       |       |
| 10                    | 2     | 2     | 1     | 2        | 15    | 26    | 22    | 2              | 2     | 3     | 2        | 13    | 16    | 13    |
| 30                    | 16    | 10    | 12    | 10       | 41    | 56    | 52    | 5              | 6     | 8     | 5        | 22    | 27    | 23    |
| 50                    | 32    | 23    | 21    | 26       | 59    | 66    | 68    | 4              | 8     | 9     | 5        | 23    | 34    | 26    |
| 100                   | 59    | 51    | 48    | 51       | 85    | 86    | 91    | 4              | 3     | 5     | 1        | 15    | 30    | 22    |
| $a = 0.004; H = 0.16$ |       |       |       |          |       |       |       |                |       |       |          |       |       |       |
| 10                    | 2     | 1     | 2     | 1        | 4     | 2     | 3     | 2              | 2     | 2     | 1        | 1     | 3     | 3     |
| 30                    | 4     | 3     | 3     | 4        | 7     | 7     | 8     | 7              | 4     | 3     | 1        | 9     | 12    | 9     |
| 50                    | 10    | 5     | 4     | 6        | 14    | 18    | 16    | 10             | 5     | 5     | 2        | 9     | 24    | 14    |
| 100                   | 20    | 15    | 15    | 20       | 30    | 35    | 37    | 12             | 7     | 8     | 4        | 19    | 39    | 22    |

$N = 250$  and  $v = 0.001$  for  $H = 0.5$ .  $N = 250$  and  $v = 0.0002$  for  $H = 0.16$ . The size of populations 2, 5, and 8 are reduced to a half.

When  $H$  is low and the divergence level is high,  $P_C$  is slightly higher for  $F_{ST}$  than for  $D_C$ .

*Means and sampling errors of distance measures:* The efficiency of constructing phylogenetic trees by means of genetic distances depends on the linear relationship with time and the sampling error of the distance measures used (NEI *et al.* 1983; GOLDSTEIN and POLLOCK 1994; TAJIMA and TAKEZAKI 1994). We have therefore examined these properties. Figure 2A shows the relationships of the mean distance and evolutionary time ( $2vt$ ) for various distance measures for the case of  $H = 0.5$ . The results for  $H = 0.16$  are not shown here, because the relationships are essentially the same as those for  $H = 0.5$ . The mean  $D_S$  increases linearly with time, as expected. However, the average values of all other distance measures reach a certain level of plateau, though when the divergence level is low, they increase approximately linearly with time. The average  $D_m$  increases fairly linearly with time even for a higher divergence level. By contrast, the rate of increase with time quickly decreases in  $F_{ST}$  and  $D_C$  compared with other distances. Generally,  $D_S$ ,  $D_m$ ,  $X^2$ , and  $D_A$  are better than  $F_{ST}$ ,  $D_R$ , and  $D_C$  with respect to the linear relationship with time.

To measure the extent of sampling error, we computed the coefficient of variation (CV) for each distance measure. Figure 2B shows the relationships between the CV and the evolutionary time ( $2vt$ ) for  $H = 0.5$  for 30 loci. The relationships for  $H = 0.16$  were similar to those for  $H = 0.5$ , though the CV's were generally higher in this case. The CV's for  $X^2$  are not shown in Figure 2B, because they were virtually identical with those for  $D_A$ . As expected, the CV's are large for low divergence levels in all distance measures but decrease as the divergence level increases. For a very high divergence level, however, the CV's for  $D_S$  and  $F_{ST}$  tend to increase.

Figure 2B shows that  $D_S$  has the largest CV's among all distance measures examined. Apparently, because of this large CV, the  $P_C$ 's for  $D_S$  are low even though the expected value of  $D_S$  has a perfect linear relationship with time. The CV's for  $D_m$  were the second largest following those for  $D_S$ , whereas  $D_C$  had the smallest CV.  $F_{ST}$  has a relatively high CV for  $H = 0.5$ , but in the case of  $H = 0.16$ , the CV for  $F_{ST}$  rapidly decreases as the divergence level increases. These low CV's seem to be responsible for a relatively high  $P_C$  for  $F_{ST}$  for the case of  $a = 0.1$  and  $H = 0.16$ .

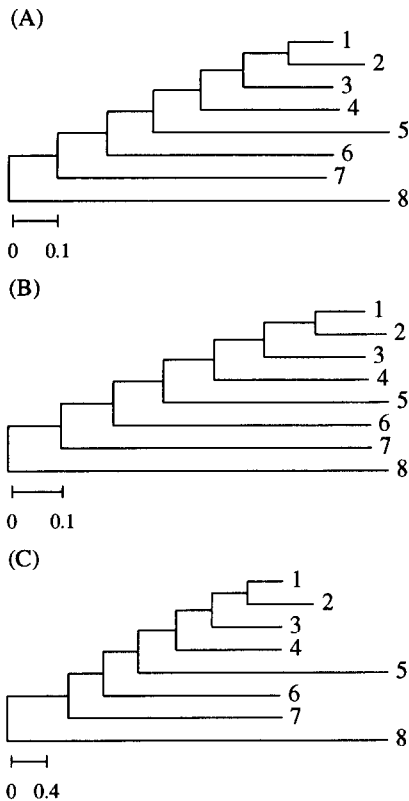

FIGURE 3.—NJ trees constructed by using average distances affected by the bottleneck effect. (A)  $D_S$  for  $H = 0.5$ ;  $a = 0.1$  with the IAM. (B)  $D_S$  for  $H = 0.16$ ;  $a = 0.1$  with the IAM. (C)  $(\delta\mu)^2$  for  $H = 0.8$ ;  $a = 0.4$  with the SMM. The branch lengths for populations 2, 5, and 8 are elongated because of the bottleneck effect. When  $a = 0.1$ , the extent of elongation is higher for  $H = 0.5$  than for  $H = 0.16$ . The average values of  $D_S$  and  $(\delta\mu)^2$  were computed for 100 loci.

**Bottleneck effect:** Table 2 shows the  $P_C$  values for the case where populations undergo a bottleneck. In this case the  $P_C$ 's for NJ and UPGMA both become smaller than those for the case of a constant population size (Table 1). Further, the  $P_C$ 's for UPGMA are generally lower than those for NJ in this case. When a bottleneck occurs, the distance values are known to increase rapidly (CHAKRABORTY and NEI 1977). Figure 3, A and B show NJ trees constructed by using the average  $D_S$  for  $H = 0.5$  and  $0.16$  when a divergence level is high ( $a = 0.1$ ). In these trees, the branch lengths for the populations that went through a bottleneck are elongated. Thus, the evolutionary rate varies considerably with population, even if the mutation rate remains the same. In this case UPGMA is not efficient in obtaining the correct topology, because the assumption of rate constancy is violated. Thus,  $P_C$  values of  $D_R$ ,  $D_m$ , and  $F_{ST}$  are nearly zero irrespective of the number of loci used.

The extent of decrease of  $P_C$  due to the bottleneck effect clearly depends on the bottleneck effect on distance measures. Thus, when the divergence level is high, the bottleneck effect on distance values is larger for  $H = 0.5$  than for  $H = 0.16$  (Figure 3, A and B), and

the  $P_C$  values decline more drastically in the former case than in the latter. By contrast, when the divergence level was low, distance values increased considerably owing to the bottleneck effect for both heterozygosity levels (data not shown), and  $P_C$ 's declined substantially.

Although every distance measure is affected by the bottleneck effect,  $D_A$ ,  $D_C$ , and  $X^2$  generally show a higher  $P_C$  than the other measures, and  $P_C$ 's for  $D_A$  and  $D_C$  are higher than those for  $X^2$  except for the case of  $a = 0.1$ ;  $H = 0.16$ . The difference in  $P_C$  among other distance measures shows a pattern similar to that for the constant population size case when NJ is used. When UPGMA is used, however,  $F_{ST}$  does not perform well, giving an incorrect tree in most cases, but the  $P_C$ 's for  $D_S$  are relatively high.

**Stepwise mutation model: Constant population size:** The  $P_C$  values for the case of the SMM are presented in Table 3. To save space, the  $P_C$ 's for  $D_m$  and  $X^2$  are not presented because their efficiencies relative to the traditional distance measures were essentially the same as those for the case of the IAM. The  $P_C$ 's for UPGMA are also not shown here for the same reason. As in the case of the IAM, UPGMA performed better than NJ for the case of constant population size, but not for the case where the bottleneck effect was considered.

Table 3 shows that in the case of  $a = 0.4$ ,  $P_C$ 's are very low for any distance measure unless 300 or more loci are studied (except in the case of constant population size with  $H = 0.8$ ). They are lower than those for the case of the IAM with  $H = 0.5$  when the same number of loci are used (Table 1). This indicates that when the divergence level is high, microsatellite loci may be no better than classical markers unless the average heterozygosity for the latter markers are very low.

In the case of  $a = 0.04$ , however, the  $P_C$  values for traditional distance measures, particularly for  $D_A$  and  $D_C$ , are reasonably high if 30 or more loci are used. These values are comparable to those for the case of the IAM with  $H = 0.5$  but are higher than those for the case of the IAM with  $H = 0.16$  (Table 1). Since the heterozygosity level of classical markers is usually low, microsatellite loci seem more useful than classical markers for a study of closely related populations. Curiously, however,  $D_{SW}$  and  $(\delta\mu)^2$  show lower  $P_C$  values than traditional distance measures, except for  $a = 0.4$  and  $H = 0.5$ . This indicates that  $D_{SW}$  and  $(\delta\mu)^2$  are generally less useful than traditional distance measures for phylogenetic inference even for microsatellite loci, for which the distance measures were specifically designed. Particularly when  $a = 0.04$ ,  $D_{SW}$  shows a very poor performance for obtaining the correct tree even when 300 or more loci are studied.

The relative  $P_C$  values for traditional distance measures are essentially the same as those for the IAM, and  $D_C$  and  $D_A$  show a higher  $P_C$  than the other distance measures irrespective of the values of  $a$  and  $H$ .

**Means and sampling errors of distance measures:** Figure

**TABLE 3**  
**Percentage of replications in which the correct topology was obtained**  
**for the stepwise mutation model with the NJ method**

| No. loci                             | $a = 0.4$ |       |          |       |       |          |                 | $a = 0.04$ |       |          |       |       |          |                 |
|--------------------------------------|-----------|-------|----------|-------|-------|----------|-----------------|------------|-------|----------|-------|-------|----------|-----------------|
|                                      | $D_R$     | $D_S$ | $F_{ST}$ | $D_C$ | $D_A$ | $D_{SW}$ | $(\delta\mu)^2$ | $D_R$      | $D_S$ | $F_{ST}$ | $D_C$ | $D_A$ | $D_{SW}$ | $(\delta\mu)^2$ |
| $H = 0.8$ ; constant population size |           |       |          |       |       |          |                 |            |       |          |       |       |          |                 |
| 10                                   | 4         | 4     | 3        | 5     | 5     | 0        | 1               | 16         | 11    | 12       | 30    | 25    | 0        | 1               |
| 30                                   | 17        | 19    | 21       | 26    | 25    | 5        | 4               | 52         | 44    | 46       | 69    | 67    | 1        | 7               |
| 100                                  | 53        | 51    | 56       | 67    | 66    | 14       | 23              | 91         | 89    | 89       | 98    | 97    | 2        | 26              |
| 300                                  | 84        | 83    | 86       | 94    | 94    | 55       | 58              | 100        | 100   | 100      | 100   | 100   | 7        | 62              |
| $H = 0.5$ ; constant population size |           |       |          |       |       |          |                 |            |       |          |       |       |          |                 |
| 10                                   | 0         | 1     | 0        | 1     | 3     | 1        | 1               | 3          | 3     | 3        | 6     | 5     | 1        | 1               |
| 30                                   | 1         | 4     | 2        | 8     | 7     | 7        | 8               | 20         | 14    | 17       | 27    | 26    | 1        | 4               |
| 100                                  | 18        | 18    | 23       | 26    | 29    | 37       | 29              | 57         | 53    | 60       | 69    | 70    | 7        | 17              |
| 300                                  | 43        | 47    | 51       | 57    | 67    | 76       | 72              | 93         | 90    | 94       | 97    | 96    | 30       | 58              |
| $H = 0.8$ ; bottleneck               |           |       |          |       |       |          |                 |            |       |          |       |       |          |                 |
| 10                                   | 3         | 2     | 2        | 4     | 4     | 0        | 1               | 11         | 8     | 6        | 17    | 18    | 0        | 0               |
| 30                                   | 11        | 8     | 9        | 19    | 15    | 1        | 2               | 34         | 29    | 29       | 45    | 46    | 0        | 3               |
| 100                                  | 28        | 35    | 39       | 41    | 51    | 3        | 17              | 66         | 74    | 75       | 80    | 85    | 3        | 17              |
| 300                                  | 47        | 71    | 74       | 61    | 78    | 0        | 55              | 92         | 98    | 97       | 97    | 100   | 2        | 44              |
| $H = 0.5$ ; bottleneck               |           |       |          |       |       |          |                 |            |       |          |       |       |          |                 |
| 10                                   | 1         | 0     | 1        | 1     | 1     | 3        | 1               | 3          | 2     | 3        | 4     | 5     | 0        | 1               |
| 30                                   | 3         | 1     | 3        | 4     | 6     | 3        | 5               | 11         | 10    | 16       | 15    | 19    | 1        | 2               |
| 100                                  | 12        | 14    | 18       | 22    | 24    | 17       | 28              | 38         | 39    | 45       | 47    | 54    | 0        | 12              |
| 300                                  | 37        | 41    | 43       | 51    | 61    | 32       | 78              | 74         | 77    | 82       | 74    | 84    | 5        | 43              |

$a = 0.4$ .  $N = 150$ , and  $v = 0.02$  for  $H = 0.8$ .  $N = 94$ , and  $v = 0.004$  for  $H = 0.5$ .  $a = 0.04$ .  $N = 300$  and  $v = 0.01$  for  $H = 0.8$ .  $N = 188$  and  $v = 0.002$  for  $H = 0.5$ . In the case of bottleneck,  $N$  and  $v$  were the same as the above except for  $N = 188$  and  $v = 0.002$  for  $a = 0.4$  and  $H = 0.5$ .  $N$  was reduced to a half after separation from the ancestral populations in populations 2, 5, 8.

4A shows the relationships between the mean distance and evolutionary time ( $2vt$ ) for various distance measures for the case of  $H = 0.8$ . The results for the case of  $H = 0.5$  are not shown, because they are similar to those for the case of  $H = 0.8$ . As expected,  $(\delta\mu)^2$  has a linear relationship with time.  $D_{SW}$  also increases almost linearly with time. All the traditional distance measures are nonlinearly related with time, though the relationships are initially linear. The initial linear relationship is slightly better for  $D_S$  and  $D_A$  than  $D_C$ .

Figure 4B shows the relationships between the CV's and evolutionary time ( $2vt$ ) for  $H = 0.8$ . The CV's for  $F_{ST}$  and  $D_R$  are not shown, because they are close to those for  $D_A$  and  $D_C$ , respectively. The CV's for  $(\delta\mu)^2$  and  $D_{SW}$  are clearly much greater than those of the traditional distance measures. These high CV's explain the poor performance of  $(\delta\mu)^2$  and  $D_{SW}$  in phylogenetic reconstruction, though the mean values are linearly related with time (see Figure 4A).

ZHIVOLOVSKY and FELDMAN (1995) analytically showed that CV for  $(\delta\mu)^2$  is approximately constant if a sufficiently high divergence level is considered. In the range of divergence shown in Figure 4B ( $2vt \leq 6$ ), however, it

is still decreasing for  $H = 0.8$ . For  $H = 0.5$  CV for  $(\delta\mu)^2$  reached a plateau more quickly (data not shown). In contrast to the case of  $(\delta\mu)^2$ ,  $D_{SW}$  has a very high CV, but the CV drops quickly for high divergence. Therefore,  $D_{SW}$  has a larger CV than  $(\delta\mu)^2$  for a low divergence level but a smaller CV for a high divergence level.

The CV's for traditional distance measures are nearly constant over time except in the initial stage. Particularly,  $D_S$  has a large CV when  $2vt$  is small, but the CV quickly declines to reach an apparent constant value. Here, too,  $D_C$  and  $D_A$  have a smaller CV than  $D_S$ . The relationships between CV's and  $2vt$  for  $H = 0.5$  were more or less the same as those for  $H = 0.8$ .

**Bottleneck effect:** The effect of population size change (bottleneck effect) on  $P_C$ 's for the NJ trees are shown in the lower half of Table 3. In the presence of the bottleneck effect,  $P_C$ 's are generally smaller than those for the constant population size case (upper half of Table 3), as in the case of the IAM. The distance values increase rapidly in the presence of the bottleneck effect (Figure 3C), and the extent of decrease of  $P_C$ 's is positively correlated to the extent of distance increase.

The relative values of  $P_C$ 's for different distance mea-

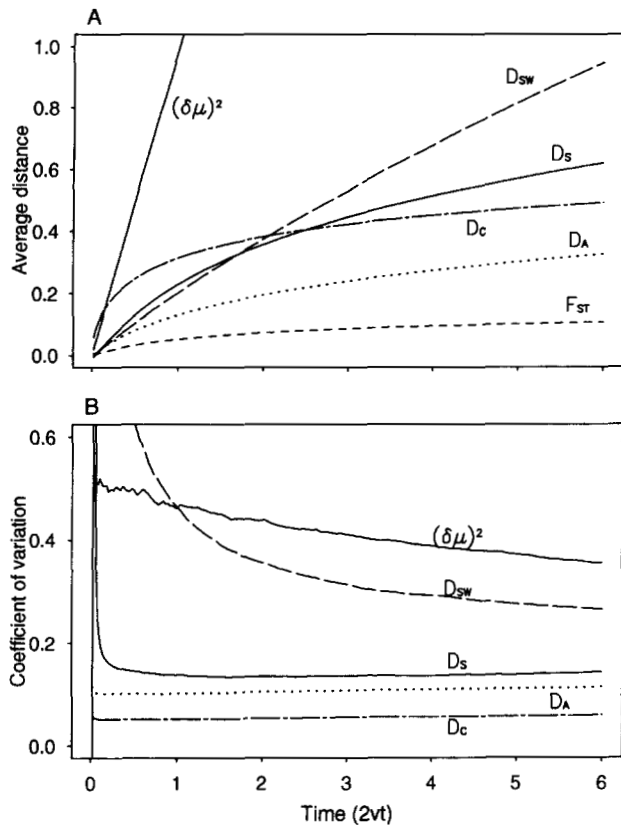

FIGURE 4.—Relationships of the mean distance and the coefficient of variation with evolutionary time ( $2vt$ ) for the case of the SMM with  $H = 0.8$ . (A) Mean distance. (B) Coefficient of variation (CV). The means and CV's for each distance measure were computed for 100 loci and 30 loci, respectively, with 10,000 replications.

measures are generally the same as those for the constant population size. The  $P_C$  values for the traditional distance measures are again higher than those of  $D_{SW}$  and  $(\delta\mu)^2$  for  $a = 0.04$ ;  $H = 0.8$  and  $0.5$  and  $a = 0.4$ ;  $H = 0.8$ . Since the efficiencies of  $D_A$  and  $D_C$  are higher than other traditional distance measures,  $D_A$  and  $D_C$  performed best in these cases. By contrast, in the case of  $a = 0.4$  and  $H = 0.5$ ,  $(\delta\mu)^2$  tends to show a higher  $P_C$  value than all other distance measures. In the case of constant population size, the  $P_C$ 's for  $D_{SW}$  and  $(\delta\mu)^2$  are similar to each other when  $a = 0.4$ , but in the presence of the bottleneck effect, the  $P_C$ 's for  $D_{SW}$  drastically decrease. Although the CV for  $D_{SW}$  is smaller than that for  $(\delta\mu)^2$  when the divergence level is high (Figure 4B), the  $P_C$  for  $D_{SW}$  is severely affected by the bottleneck effect. In practice, population size would change frequently in the evolutionary process, so  $(\delta\mu)^2$  seems superior to  $D_{SW}$  in actual data analysis.

**Sample size:** So far we assumed that the  $P_C$  values are computed by sampling all individuals in the populations. In practice, however, the number of individuals sampled are usually limited. Therefore, we examined the effect of sample size on  $P_C$  values. In Table 4 we present only the  $P_C$  values for  $D_A$ , since other distance

measures showed similar results. The number of individuals sampled varied from 10 to 50. The  $P_C$  values for the entire populations sampled are also shown in the table.

When the divergence level is high, the sample size ( $s$ ) does not make much difference for the  $P_C$  values in both the IAM and SMM as long as  $s \geq 20$ . In the case of the IAM, this is true whether the heterozygosity level is high ( $H = 0.5$ ) or low ( $H = 0.16$ ). Similarly, in the case of the SMM, the sample size effect is very small when the heterozygosity level is low ( $H = 0.5$ ). When the heterozygosity level is high ( $H = 0.8$ ), however,  $P_C$  is lower for  $s = 10 \sim 20$  than for  $s \geq 30$ . This is in agreement with SHRIVER *et al.*'s (1993) result. By contrast, when the divergence level is low,  $P_C$  increases with increasing sample size up to  $s = 50$  if the heterozygosity is high ( $H = 0.5$  for IAM and  $H = 0.8$  for SMM). When average heterozygosity is low, however, the sample size effect is not substantial. Therefore, in general, it is more important to examine a large number of loci rather than a large number of genes per locus to have a higher  $P_C$  value. However, if the average heterozygosity is high and divergence level is low, a large number of individuals ( $s \approx 50$ ) should be also examined.

## DISCUSSION

Our computer simulation has shown that  $D_A$  and  $D_C$  are most efficient in obtaining the correct tree topology in many different conditions examined. This is so despite the fact that  $D_A$  and  $D_C$  are based on geometric distances of populations represented on a multidimensional hypersphere and are independent of the mutational models (NEI 1987). The expected values of  $D_S$  and  $(\delta\mu)^2$  increase linearly with time under the IAM and the SMM, respectively, as mentioned earlier. However, the efficiencies of  $D_S$  and  $(\delta\mu)^2$  for obtaining the correct tree are generally low. This has happened because  $D_S$  and  $(\delta\mu)^2$  have a large sampling error. Therefore, the extent of sampling error is an important factor for determining the efficiency of a distance measure in phylogenetic reconstruction. However, the coefficient of variation is not the sole determinant of the efficiency, and the linear relationship with time also plays some role, as is clear from the comparison of CV's between  $D_C$  and  $D_A$ . This conclusion is similar to NEI *et al.*'s (1983) and suggests that different distance measures should be used for reconstructing a topology and estimating branch lengths. In general,  $D_A$  and  $D_C$  are superior to other distance measures in topology construction and  $D_S$  and  $(\delta\mu)^2$  are better than others in branch-length estimation, depending on the model used. Therefore, it seems to be preferable to use  $D_A$  and  $D_C$  for constructing a topology and then use  $D_S$  for estimating branch lengths for electrophoretic or immunological data and  $(\delta\mu)^2$  for microsatellite loci (NEI 1995). A statistical method for conducting this type of statistical



**TABLE 4**  
**Percentage of replications in which the correct topology was obtained**  
**by the NJ method for different sample sizes**

| Sample<br>size ( <i>s</i> ) | No. loci              |    |    |     |                  |    |    |     |                         |    |    |     |                 |    |    |     |
|-----------------------------|-----------------------|----|----|-----|------------------|----|----|-----|-------------------------|----|----|-----|-----------------|----|----|-----|
|                             | Infinite allele model |    |    |     |                  |    |    |     | Stepwise mutation model |    |    |     |                 |    |    |     |
|                             | <i>a</i> = 0.1        |    |    |     | <i>a</i> = 0.004 |    |    |     | <i>a</i> = 0.4          |    |    |     | <i>a</i> = 0.04 |    |    |     |
|                             | 10                    | 30 | 50 | 100 | 10               | 30 | 50 | 100 | 10                      | 30 | 50 | 100 | 10              | 30 | 50 | 100 |
|                             | <i>H</i> = 0.5        |    |    |     |                  |    |    |     | <i>H</i> = 0.8          |    |    |     |                 |    |    |     |
| 10                          | 13                    | 59 | 75 | 94  | 1                | 5  | 12 | 46  | 2                       | 8  | 24 | 45  | 1               | 4  | 9  | 32  |
| 20                          | 11                    | 60 | 80 | 94  | 5                | 24 | 50 | 81  | 4                       | 16 | 30 | 55  | 2               | 16 | 34 | 74  |
| 30                          | 15                    | 61 | 81 | 95  | 9                | 39 | 65 | 94  | 4                       | 17 | 38 | 58  | 7               | 26 | 46 | 82  |
| 50                          | 15                    | 63 | 80 | 94  | 13               | 54 | 76 | 94  | 4                       | 19 | 41 | 64  | 9               | 35 | 64 | 90  |
| All                         | 17                    | 62 | 80 | 94  | 25               | 69 | 88 | 98  | 4                       | 23 | 43 | 66  | 23              | 57 | 73 | 97  |
|                             | <i>H</i> = 0.16       |    |    |     |                  |    |    |     | <i>H</i> = 0.5          |    |    |     |                 |    |    |     |
| 10                          | 8                     | 33 | 57 | 80  | 1                | 5  | 13 | 36  | 1                       | 7  | 12 | 29  | 2               | 7  | 32 | 58  |
| 20                          | 6                     | 34 | 57 | 80  | 2                | 8  | 17 | 48  | 2                       | 6  | 13 | 31  | 2               | 16 | 41 | 67  |
| 30                          | 7                     | 35 | 58 | 79  | 2                | 9  | 24 | 51  | 2                       | 7  | 16 | 29  | 3               | 20 | 41 | 68  |
| 50                          | 6                     | 36 | 58 | 80  | 2                | 12 | 24 | 54  | 3                       | 7  | 16 | 31  | 3               | 19 | 46 | 72  |
| All                         | 7                     | 36 | 59 | 80  | 3                | 15 | 28 | 54  | 3                       | 7  | 16 | 29  | 3               | 19 | 47 | 71  |

*s* is the number of individuals sampled.  $D_A$  distance was used. Infinite-allele model. In the case of  $a = 0.1$   $N = 250$  for  $H = 0.5$  and for  $H = 0.16$ . In the case of  $a = 0.004$ ,  $N = 250$  for  $H = 0.5$ , and  $N = 100$  for  $H = 0.16$ . Stepwise mutation model. In the case of  $a = 0.4$ ,  $N = 150$  for  $H = 0.8$ , and  $N = 94$  for  $H = 0.5$ . In the case of  $a = 0.04$ ,  $N = 300$  for  $H = 0.8$  and  $N = 188$  for  $H = 0.5$ .

analysis has already been developed (TAKEZAKI *et al.* 1995). It should also be noted that the linear relationship with time is better for  $D_A$  than for  $D_C$ . Therefore, a tree constructed with  $D_A$  may be sufficient for many purposes unless the evolutionary time considered is very long.

In the present paper we are primarily concerned with phylogenetic reconstruction of intraspecific populations for microsatellite loci. However, when a phylogenetic relationship of different species is to be studied,  $(\delta\mu)^2$  can be quite high. For example, the  $(\delta\mu)^2$  between humans and chimpanzees for 25 microsatellite loci is  $\sim 25$  (data from BOWCOCK *et al.* 1994), whereas the  $(\delta\mu)^2$  between domestic sheep and Rocky Mountain bighorn sheep for eight microsatellite loci (data from FORBES *et al.* 1995) is  $\sim 39$ . In the latter case there is one locus that shows an extremely high degree of variation, and if we exclude this locus,  $(\delta\mu)^2$  becomes  $\sim 14$ .

To obtain some idea about the utility of microsatellite loci for a study of genetic differentiation of different species, we conducted an additional computer simulation with  $a = 1$  and 2, for which the largest expected number of gene substitutions ( $2vt$ ) were 14 and 28, respectively, without the bottleneck effect. Table 5 shows the results of this simulation. The  $P_C$  values for traditional distance measures are now considerably smaller than those for the cases of  $a = 0.04$  and 0.4. By contrast,  $(\delta\mu)^2$  and  $D_{SW}$  tend to show slightly higher values than those in Table 3. Indeed, when  $H = 0.5$ , they show higher  $P_C$  values than traditional distance

measures. However, the  $P_C$ 's for them are still quite low unless 300 or more loci are studied.

In the present study we assumed that microsatellite loci are subject to the mutational pattern of the SMM. In practice, this assumption does not necessarily hold, and there is evidence that mutation sometimes produces nucleotide repeat patterns that require two or more step changes (KWIATKOWSKI *et al.* 1992; WEBER and WONG 1993). For this reason, VALDES *et al.* (1993), DI RIENZO *et al.* (1994), and GARZA *et al.* (1995) proposed mathematical models that allow changes of more than one step with some probability. Our computer simulation has shown that these models give essentially the same relative  $P_C$  values as those for the SMM used here (data not shown) and that details of mathematical models of the evolutionary change of microsatellite loci are unimportant for phylogenetic reconstruction.

However, the real problem with microsatellite loci is that the mutational pattern is often irregular and that there seems to be an upper limit of the number of repeats (FORBES *et al.* 1995; GARZA *et al.* 1995; GOLDSTEIN *et al.* 1995b). Furthermore, some microsatellite loci are highly polymorphic in some populations or species but monomorphic in others. For example, four out of the 25 polymorphic loci in humans are apparently monomorphic in chimpanzees (data from BOWCOCK *et al.* 1994). Even within humans some highly polymorphic loci in Europeans are monomorphic in Amerindians. This raises a question about the long-term stability of microsatellite loci. At the present time, we

TABLE 5

Percentage of replications in which the correct topology was obtained for highly divergent populations in the case of the stepwise mutation model

| No. loci  | $a = 2$ |       |          |       |       |          |                 | $a = 1$ |       |          |       |       |          |                 |
|-----------|---------|-------|----------|-------|-------|----------|-----------------|---------|-------|----------|-------|-------|----------|-----------------|
|           | $D_R$   | $D_S$ | $F_{ST}$ | $D_C$ | $D_A$ | $D_{SW}$ | $(\delta\mu)^2$ | $D_R$   | $D_S$ | $F_{ST}$ | $D_C$ | $D_A$ | $D_{SW}$ | $(\delta\mu)^2$ |
| $H = 0.8$ |         |       |          |       |       |          |                 |         |       |          |       |       |          |                 |
| 10        | 1       | 1     | 0        | 0     | 0     | 3        | 1               | 2       | 1     | 2        | 4     | 4     | 2        | 5               |
| 30        | 4       | 4     | 6        | 8     | 9     | 8        | 5               | 8       | 7     | 9        | 12    | 11    | 7        | 4               |
| 100       | 16      | 17    | 22       | 38    | 40    | 38       | 26              | 30      | 31    | 32       | 47    | 49    | 30       | 22              |
| 300       | 55      | 59    | 63       | 76    | 78    | 81       | 78              | 64      | 66    | 68       | 82    | 84    | 77       | 64              |
| $H = 0.5$ |         |       |          |       |       |          |                 |         |       |          |       |       |          |                 |
| 10        | 2       | 0     | 0        | 0     | 0     | 1        | 3               | 1       | 1     | 0        | 0     | 0     | 3        | 2               |
| 30        | 0       | 1     | 1        | 2     | 2     | 9        | 8               | 1       | 1     | 1        | 1     | 1     | 4        | 6               |
| 100       | 5       | 4     | 4        | 8     | 10    | 40       | 38              | 9       | 6     | 8        | 13    | 18    | 41       | 42              |
| 300       | 28      | 25    | 29       | 40    | 47    | 88       | 87              | 32      | 30    | 35       | 50    | 56    | 81       | 83              |

The NJ method was used.  $N = 75$ , and  $v = 0.04$  for  $H = 0.8$ .  $N = 47$ , and  $v = 0.008$  for  $H = 0.5$ . The size of all populations remained constant.

do not know the reason for the difference in the extent of polymorphism between different populations. Therefore, some caution is necessary in the extrapolation of our results to the study of distantly related populations.

Another disturbing factor in the use of microsatellite loci is that the mutation rate seems to vary considerably from locus to locus and this will increase the variance of distance values. Therefore, the coefficients of variation given in Figure 4B should be considered to be minimum, and the actual  $P_C$  values are expected to be smaller than those given in Tables 3–5. The bottleneck effect also would contribute to reducing the  $P_C$  values, as we have seen before.

Despite these problems with microsatellite loci, they are clearly useful for studying the genetic relationships of closely related populations. With classical genetic markers, it is often difficult to study this problem, because there are not many polymorphic loci that are used for this purpose. In the case of microsatellite loci, it is relatively easy to examine many polymorphic loci. Therefore, at least for studying closely related populations microsatellite loci are expected to be very useful.

This study was supported by research grants from the National Institutes of Health and the National Science Foundation to M.N.

#### LITERATURE CITED

- BHATTACHARYA, A., 1946 On a measure of divergence between two multinomial populations. *Sankhya* **7**: 401–407.
- BOWCOCK, A. M., A. RUIZ-LINARES, J. TOMFOHRDE, E. MINCH, J. R. KIDD *et al.*, 1994 High resolution of human evolutionary trees with polymorphic microsatellites. *Nature* **368**: 455–457.
- CAVALLI-SFORZA, L. L., 1969 Human diversity. *Proc. 12th Intl. Cong. Genet., Tokyo* **3**: 405–416.
- CAVALLI-SFORZA, L. L., and A. W. F. EDWARDS, 1967 Phylogenetic analysis: models and estimation procedures. *Amer. J. Hum. Genet.* **19**: 233–257.
- CHAKRABORTY, R., and M. NEI, 1977 Bottleneck effects on average

- heterozygosity and genetic distance with the stepwise mutation model. *Evolution* **31**: 347–356.
- DEKA, R., L. JIN, M. D. SHRIVER, L. M. YU, S. DECROO *et al.*, 1995 Population genetics of dinucleotide  $(dC-dA)_n \cdot (dG-dT)_n$  polymorphisms in world populations. *Amer. J. Hum. Genet.* **56**: 461–474.
- DI RIENZO, A., A. C. PETERSON, J. C. GARZA, A. M. VALDES, M. SLATKIN *et al.*, 1994 Mutational processes of simple-sequence repeat loci in human populations. *Proc. Natl. Acad. Sci. USA* **91**: 3166–3170.
- FORBES, S. H., J. T. HOGG, F. C. BUCHANAN, A. M. CRAWFORD and F. W. ALLENDORF, 1995 Microsatellite evolution in congeneric mammals: domestic and bighorn sheep. *Mol. Biol. Evol.* **12**: 1106–1113.
- GARZA, J. C., M. SLATKIN and N. B. FREIMER, 1995 Microsatellite allele frequencies in humans and chimpanzees, with implications for constraints on allele size. *Mol. Biol. Evol.* **12**: 594–603.
- GOLDSTEIN, D. B., and D. D. POLLOCK, 1994 Least squares estimation of molecular distance-noise abatement in phylogenetic reconstruction. *Theor. Pop. Biol.* **45**: 219–226.
- GOLDSTEIN, D. B., A. RUIZ LINARES, L. L. CAVALLI-SFORZA and M. W. FELDMAN, 1995a Genetic absolute dating based on microsatellites and the origin of modern humans. *Proc. Natl. Acad. Sci. USA* **92**: 6723–6727.
- GOLDSTEIN, D. B., A. RUIZ LINARES, L. L. CAVALLI-SFORZA and M. W. FELDMAN, 1995b An evaluation of genetic distances for use with microsatellite loci. *Genetics* **139**: 463–471.
- GOTTELLI, D., C. SILLERO-ZUBIRL, G. D. APPELBAUM, M. S. ROY, D. J. GIRMAN *et al.*, 1994 Molecular genetics of the most endangered canid: the Ethiopian wolf *Canis simensis*. *Mol. Ecol.* **3**: 301–312.
- JORDE, L. B., M. J. BAMSHAD, W. S. WATKINS, R. ZENGER, A. E. FRALEY *et al.*, 1995 Origins and affinities of modern humans: a comparison of mitochondrial and nuclear genetic data. *Am. J. Hum. Genet.* **57**: 523–538.
- KIMURA, M., and J. F. CROW, 1964 The number of alleles that can be maintained in a finite population. *Genetics* **49**: 725–738.
- KWIATKOWSKI, D. J., E. P. HENSKE, K. WEIMER, L. OZELIUS, J. F. GUSSELLA *et al.*, 1992 Construction of a GT polymorphism map in human 9q. *Genomics* **12**: 229–240.
- LATTER, B. D. H., 1972 Selection in finite populations with multiple alleles. III. Genetic divergence with centripetal selection and mutation. *Genetics* **70**: 475–490.
- LI, W.-H., and M. NEI, 1975 Drift variances of heterozygosity and genetic distance in transient states. *Genet. Res. Camb.* **25**: 220–248.
- NEI, M., 1972 Genetic distance between populations. *Amer. Nat.* **106**: 283–291.
- NEI, M., 1973 The theory and estimation of genetic distance, pp.

- 45–54 in *Genetic Structure of Populations*, edited by N. E. MORTON. University Press of Hawaii, Honolulu.
- NEI, M., 1975 *Molecular Population Genetics and Evolution*. North-Holland, Amsterdam.
- NEI, M., 1987 *Molecular Evolutionary Genetics*. Columbia University Press, New York.
- NEI, M., 1991 Relative efficiencies of different tree-making methods for molecular data, pp. 90–128 in *Phylogenetic Analysis of DNA Sequence*, edited by M. M. MIYAMOTO and J. CRACRAFT. Oxford University Press, New York.
- NEI, M., 1995 Genetic support for the out-of-Africa theory of human evolution. *Proc. Natl. Acad. Sci. USA* **92**: 6653–7136.
- NEI, M., and N. TAKEZAKI, 1994 Estimation of genetic distances and phylogenetic trees from DNA analysis. *Proc. 5th World Cong. Genet. Appl. Livestock Prod.* **21**: 405–412.
- NEI, M., F. TAJIMA and Y. TATENO, 1983 Accuracy of estimated phylogenetic trees from molecular data. *J. Mol. Evol.* **19**: 153–170.
- OHTA, T., and M. KIMURA, 1973 A model of mutation appropriate to estimate the number of electrophoretically detectable alleles in a finite population. *Genet. Res. Camb.* **22**: 201–204.
- PAETKAU, D., W. CALVERT, I. STIRLING and C. STROBECK, 1995 Microsatellite analysis of population structure in Canadian polar bears. *Mol. Ecol.* **4**: 347–354.
- PREVOSTI, A., J. OCANA and G. ALONZO, 1975 Distances between populations for *Drosophila subobscura* based on chromosome arrangement frequencies. *Theor. Appl. Genet.* **45**: 231–241.
- REYNOLDS, J., B. S. WEIR and C. C. COCKERHAM, 1983 Estimation of the coancestry coefficient: basis for a short-term genetic distance. *Genetics* **105**: 767–779.
- ROGERS, J. S., 1972 Measures of genetic similarity and genetic distance, pp. 145–153 in *Studies in Genetics VII*. University of Texas Publication 7213, Austin, TX.
- ROY, M. S., E. GEFFEN, D. SMITH, E. A. OSTRANDER and R. K. WAYNE, 1994 Patterns of differentiation and hybridization in North American wolflike canids, revealed by analysis of microsatellite loci. *Mol. Biol. Evol.* **11**: 553–570.
- SAITOU, N., and M. NEI, 1987 The neighbor-joining method: a new method for reconstructing phylogenetic trees. *Mol. Biol. Evol.* **4**: 406–425.
- SANGHVI, L. D., 1953 Comparison of genetical and morphological methods for a study of biological differences. *Amer. J. Phys. Anthropol.* **11**: 385–404.
- SHRIVER, M. D., L. JIN, R. CHAKRABORTY and E. BOERWINKLE, 1993 VNTR allele frequency distributions under the stepwise mutation model: a computer simulation approach. *Genetics* **134**: 983–993.
- SHRIVER, M., L. JIN, E. BOERWINKLE, R. DEKA, R. E. FERRELL *et al.*, 1995 A novel measure of genetic distance for highly polymorphic tandem repeat loci. *Mol. Biol. Evol.* **12**: 914–920.
- SLATKIN, M., 1995 A measure of population subdivision based on microsatellite allele frequencies. *Genetics* **139**: 457–462.
- SNEATH, P. H. A., and R. R. SORAL, 1973 *Numerical Taxonomy*. W. H. Freeman, San Francisco.
- TAJIMA, F., and N. TAKEZAKI, 1994 Estimation of evolutionary distance for reconstructing molecular phylogenetic trees. *Mol. Biol. Evol.* **11**: 278–286.
- TAKEZAKI, N., A. RZHETSKEY and M. NEI, 1995 Phylogenetic test of the molecular clock and linearized trees. *Mol. Biol. Evol.* **12**: 823–833.
- VALDES, A. M., M. SLATKIN and N. B. FREIMER, 1993 Allele frequencies at microsatellite loci: the stepwise mutation model revisited. *Genetics* **133**: 737–749.
- WEBER, J. L., and C. WONG, 1993 Mutation of human short tandem repeats. *Hum. Mol. Genet.* **2**: 1123–1128.
- ZHIVOTOVSKY, L. A., and M. W. FELDMAN, 1995 Microsatellite variability and genetic distances. *Proc. Natl. Acad. Sci. USA* **92**: 11549–11552.

Communicating editor: N. TAKAHATA
